# Supplementary material
Source: MDPI journal article supplement (https://www.mdpi.com/2227-9717/9/5/734)
Supplement: s1 [file s1]

## SUPPLEMENTARY MATERIALS

### Assessment of Advanced Oxidation Processes using Zebrafish in a Non-Forced Exposure System: A Proof of Concept

Tamia Cabascango <sup>1,7,§</sup>, Karol Ortiz <sup>1,7,§</sup>, Christian Sandoval Pauker <sup>2</sup>, Isabel Espinoza Pavón <sup>1</sup>, Anuradha Ramoji <sup>3,4</sup>, Jürgen Popp <sup>3,4</sup>, Jady Pérez <sup>1</sup>, C. Miguel Pinto <sup>5</sup>, José Luis Rivera-Parra <sup>6</sup>, Florinella Muñoz-Bisestí <sup>1</sup>, María Belén Aldás <sup>7</sup>, Cristiano V.M. Araújo <sup>8</sup> and Paul Vargas Jentzsch <sup>1,\*</sup>

<sup>1</sup> Departamento de Ciencias Nucleares, Facultad de Ingeniería Química y Agroindustria, Escuela Politécnica Nacional, Ladrón de Guevara E11-253, 170525 Quito, Ecuador; paul.vargas@epn.edu.ec

<sup>2</sup> Laboratorio de Fisicoquímica, Departamento de Química, Universidad Técnica Federico Santa María, Avenida España 1680, 2390123 Valparaíso, Chile; christian.sandovalp@sansano.usm.cl

<sup>3</sup> Institut für Physikalische Chemie and Abbe Center of Photonics, Friedrich-Schiller-Universität Jena, Helmholtzweg 4, 07743 Jena, Germany; anuradha.ramoji@uni-jena.de, juergen.popp@uni-jena.de

<sup>4</sup> Leibniz Institute of Photonic Technology, Albert-Einstein-Straße 9, 07745 Jena, Germany; juergen.popp@leibniz-ipht.de

<sup>5</sup> Observatorio de Biodiversidad, Ambiente y Salud (OBBAS), Quito, Ecuador; pinto@obbas.org

<sup>6</sup> Departamento de Petróleos, Facultad de Geología y Petróleos, Escuela Politécnica Nacional, Ladrón de Guevara E11-253, 170525 Quito, Ecuador; jose.riverap@epn.edu.ec

<sup>7</sup> Departamento de Ingeniería Civil y Ambiental, Facultad de Ingeniería Civil y Ambiental, Escuela Politécnica Nacional, Ladrón de Guevara E11-253, 170525 Quito, Ecuador; maria.aldas@epn.edu.ec

<sup>8</sup> Department of Ecology and Coastal Management, Institute of Marine Sciences of Andalusia (CSIC), Puerto Real, 11519, Cádiz, Spain; cristiano.araujo@icman.csic.es

<sup>§</sup> These authors contributed equally to this work.

<sup>\*</sup> Correspondence: paul.vargas@epn.edu.ec; Tel.: ++593 2 2976300 Ext. 4231

## CONTENTS

|                                                                                                                                                                        |
|------------------------------------------------------------------------------------------------------------------------------------------------------------------------|
| Figure S1. Linear multi-compartmented non-forced static system constructed with PET bottles (p. S3)                                                                    |
| Figure S2. Schemes showing the location of synthetic waters (and/or their dilutions) in the linear multi-compartmented non-forced static system (p. S4)                |
| Table S1. Results of the water analysis of dechlorinated tap water performed by CICAM (p. S5)                                                                          |
| Figure S3. Untreated and treated synthetic water from the textile industry (p. S5)                                                                                     |
| Figure S4. Infrared spectra of the supported g-C <sub>3</sub> N <sub>4</sub> , and pyrolyzed urea and calcium oxalate monohydrate (p. S6)                              |
| Table S2. Electrical conductivity of aqueous solutions of NaCl in the compartments for the test of heterogeneity (p. S7)                                               |
| Table S3. Distribution of organisms in the compartments filled with dechlorinated water after 4 h. (p. S7)                                                             |
| Table S4. Distribution of organisms in the compartments filled with dechlorinated water after 6 h. (p. S8)                                                             |
| Table S5. Number of organisms observed after 4 h in each compartment for the assays with the untreated and treated synthetic waters from the textile industry. (p. S8) |
| Table S6. Number of organisms observed after 6 h in each compartment for the assays with the untreated and treated synthetic waters from the textile industry. (p. S9) |
| Table S7. Number of organisms observed after 4 h in each compartment for the assays with the untreated synthetic water from the cassava starch industry. (p. S9)       |
| Table S8. Number of organisms observed after 6 h in each compartment for the assays with the untreated synthetic water from the cassava starch industry. (p. S10)      |
| Table S9. Number of organisms observed after 4 h in each compartment for the assays with the treated synthetic water from the cassava starch industry. (p. S10)        |
| Table S10. Number of organisms observed after 6 h in each compartment for the assays with the treated synthetic water from the cassava starch industry. (p. S11)       |

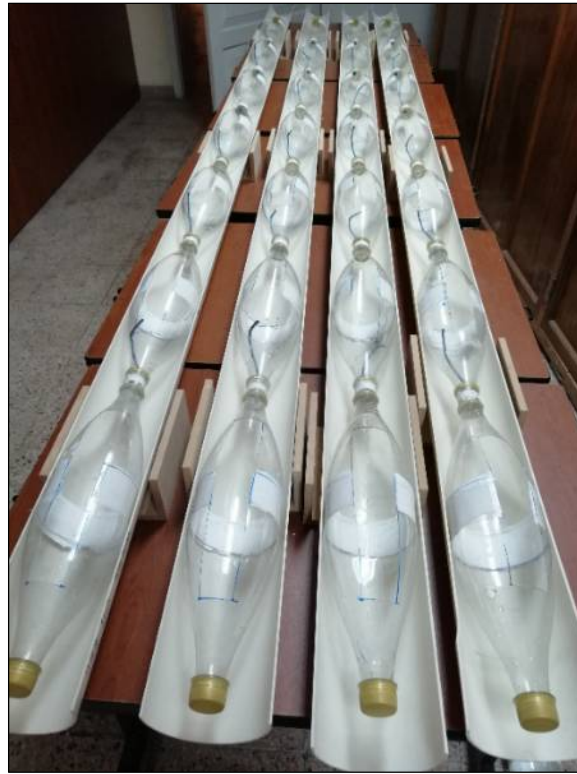

**Figure S1.** Linear multi-compartmented non-forced static system with seven compartments constructed with PET bottles.

### Assays applied to the synthetic water from the textile industry\*

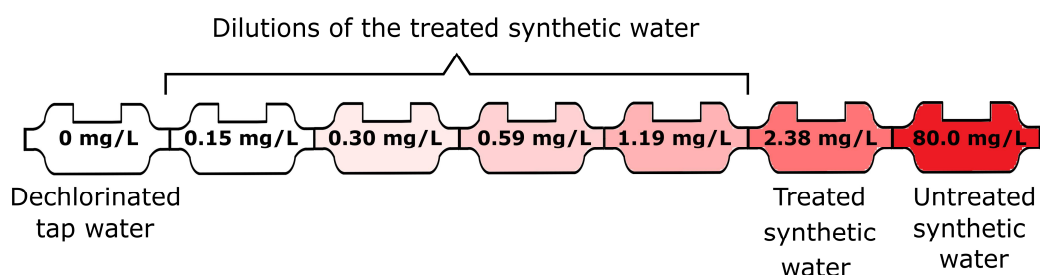

\* The concentration of the pollutant is expressed in mg/L of Reactive Red 120 dye.

### Assays applied to the synthetic water from the cassava starch industry\*\*

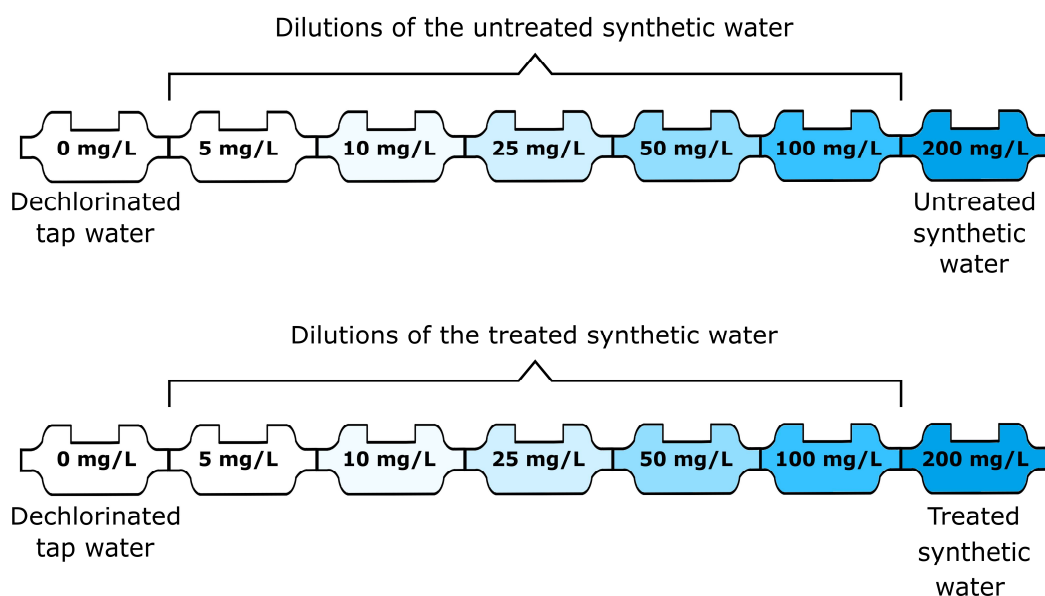

\*\* The content of organic matter is expressed as chemical oxygen demand (COD) in mg/L.

**Figure S2.** Schemes showing the location of synthetic waters from the textile and cassava starch industries (and/or their dilutions) in the linear multi-compartmented non-forced static system.

**Table S1.** Results of the water analysis of dechlorinated tap water (water used to maintain fish and dilute synthetic waters used in assays). The measurement of the parameters was performed by the Centro de Investigación y Control Ambiental (CICAM)<sup>1</sup>.

| Parameter                                   | Unit                    | Results |
|---------------------------------------------|-------------------------|---------|
| Total alkalinity                            | mg CaCO <sub>3</sub> /L | 39      |
| Residual free chlorine                      | mg/L                    | < 0.2   |
| Biochemical oxygen demand, BOD <sub>5</sub> | mg O <sub>2</sub> /L    | < 2     |
| Chemical oxygen demand, COD                 | mg O <sub>2</sub> /L    | 43      |
| Total hardness                              | mg CaCO <sub>3</sub> /L | 47      |
| Dissolved oxygen                            | mg O <sub>2</sub> /L    | 6.6     |
| pH                                          | -                       | 7.23    |
| Total solids                                | mg/L                    | 136     |
| Total dissolved solids                      | mg/L                    | 82      |
| Turbidity                                   | NTU                     | 0.31    |

<sup>1</sup> CICAM is a laboratory accredited by the Ecuadorian Service of Accreditation (SAE) under ISO/IEC 17025:2006. This accreditation includes all the parameters listed in the table.

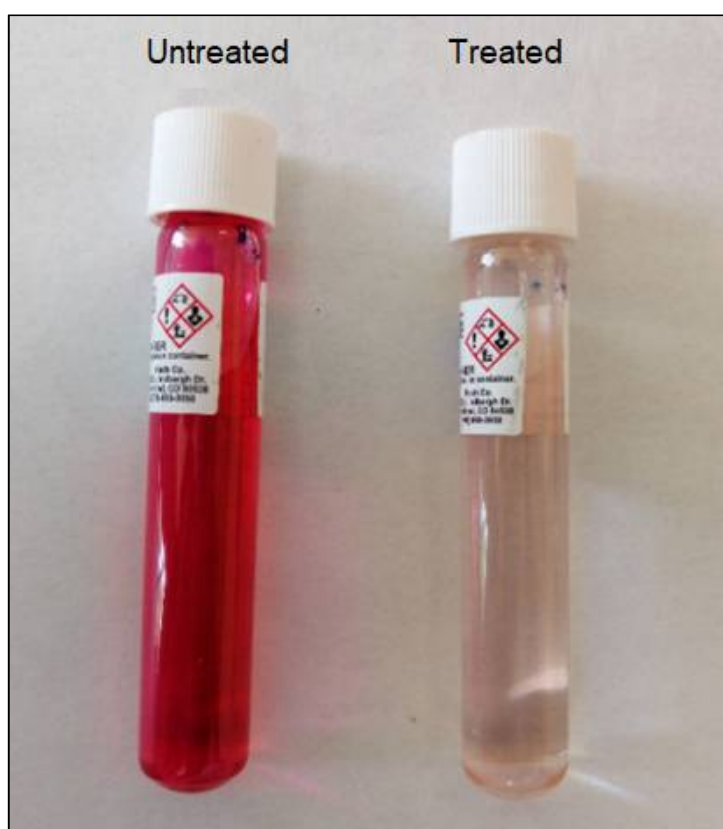

**Figure S3.** Untreated and treated synthetic water from the textile industry. The decolorization due to the treatment is noticeable.

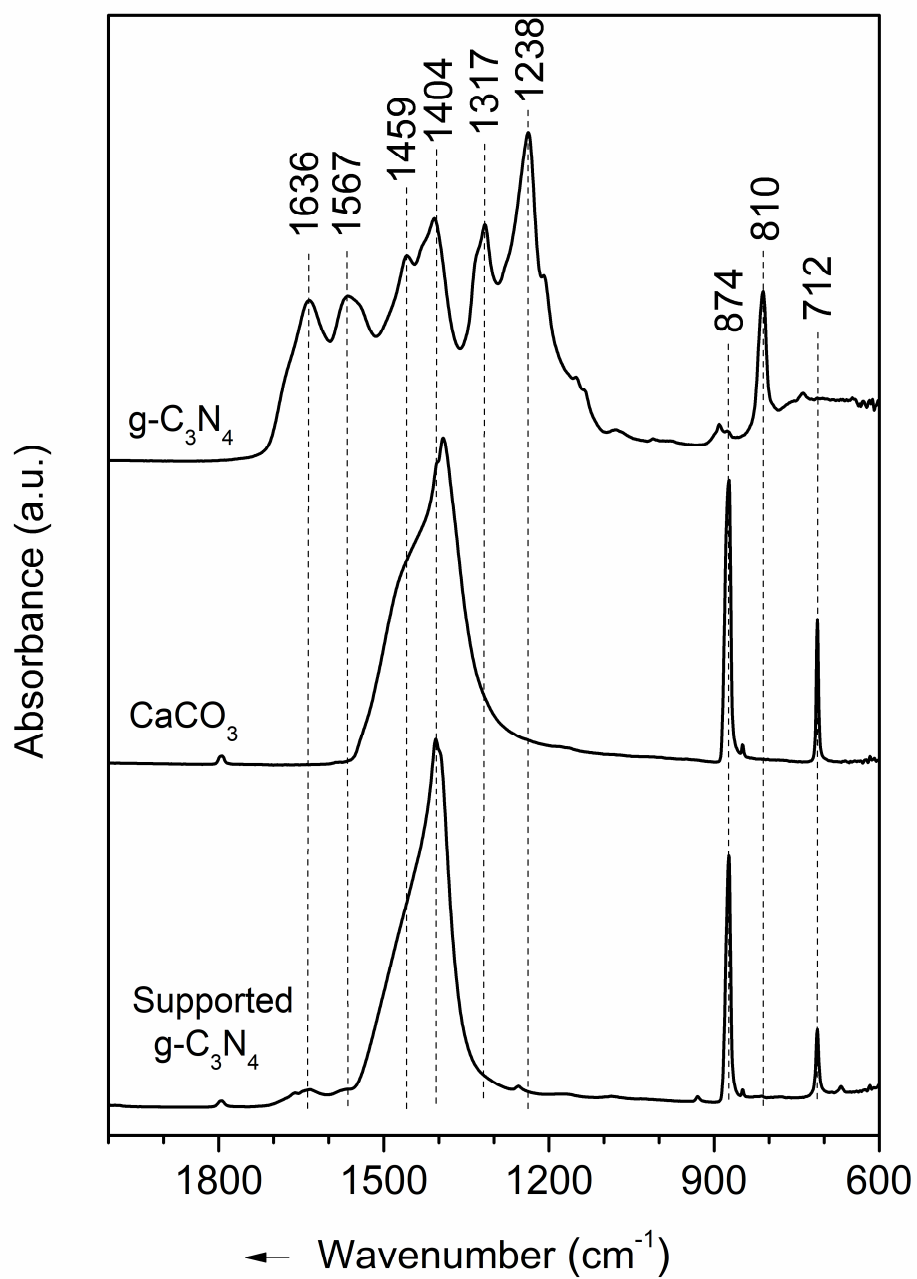

**Figure S4.** Infrared spectra of the supported g-C<sub>3</sub>N<sub>4</sub>, and pyrolyzed urea and calcium oxalate monohydrate (g-C<sub>3</sub>N<sub>4</sub> and CaCO<sub>3</sub>, respectively).

**Table S2.** Electrical conductivity of aqueous solutions of NaCl in the compartments for the test of heterogeneity.

| ELECTRICAL CONDUCTIVITY ( $\mu\text{S}/\text{cm}$ ) |        |        |        |        |        |        |        |
|-----------------------------------------------------|--------|--------|--------|--------|--------|--------|--------|
| Compartment*                                        | 1      | 2      | 3      | 4      | 5      | 6      | 7      |
| 0 h                                                 | 170.18 | 201.60 | 231.44 | 265.29 | 295.81 | 326.99 | 359.38 |
| 4 h                                                 | 174.46 | 204.00 | 236.95 | 269.08 | 299.40 | 330.21 | 358.66 |
| 6 h                                                 | 178.35 | 210.25 | 244.30 | 278.40 | 305.30 | 336.20 | 363.20 |
| Average                                             | 174.33 | 205.28 | 237.56 | 270.92 | 300.17 | 331.13 | 360.42 |
| SD                                                  | 4.08   | 4.47   | 6.45   | 6.75   | 4.79   | 4.67   | 2.44   |
| CV (%)                                              | 2.34   | 2.18   | 2.72   | 2.49   | 1.60   | 1.41   | 0.68   |

SD: Standard Deviation, CV: Coefficient of Variation

\* Initial concentration of NaCl of solutions into the compartments in increasing order: 0, 17, 34, 50, 66, 84 and 100 mg/L.

**Table S3.** Distribution of organisms in the compartments filled with dechlorinated water after 4 h.

| Repetition   | Compartments |    |    |    |    |    |    | Total |
|--------------|--------------|----|----|----|----|----|----|-------|
|              | 1            | 2  | 3  | 4  | 5  | 6  | 7  |       |
| System 1     | 2            | 4  | 4  | 2  | 4  | 2  | 3  | 21    |
| System 2     | 3            | 3  | 3  | 4  | 3  | 2  | 3  | 21    |
| System 3     | 4            | 2  | 4  | 2  | 2  | 3  | 4  | 21    |
| System 4     | 2            | 4  | 3  | 3  | 3  | 4  | 2  | 21    |
| <b>Total</b> | 11           | 13 | 14 | 11 | 12 | 11 | 12 | 84    |

**Table S4.** Distribution of organisms in the compartments filled with dechlorinated water after 6 h.

| Repetition   | Compartments |    |    |    |    |    |    | Total |
|--------------|--------------|----|----|----|----|----|----|-------|
|              | 1            | 2  | 3  | 4  | 5  | 6  | 7  |       |
| System 1     | 2            | 3  | 4  | 3  | 4  | 2  | 3  | 21    |
| System 2     | 3            | 4  | 3  | 4  | 3  | 2  | 2  | 21    |
| System 3     | 4            | 2  | 4  | 2  | 2  | 3  | 4  | 21    |
| System 4     | 3            | 4  | 3  | 3  | 3  | 3  | 2  | 21    |
| <b>Total</b> | 12           | 13 | 14 | 12 | 12 | 10 | 11 | 84    |

**Table S5.** Number of organisms (zebrafish) observed after 4 h in each compartment of the non-forced exposure system for the assays with the untreated and treated synthetic waters from the textile industry.

| Repetition                         | Concentration of RR-120 (mg/L) |       |       |       |       |       |                 |
|------------------------------------|--------------------------------|-------|-------|-------|-------|-------|-----------------|
|                                    | Treated water                  |       |       |       |       |       | Untreated water |
|                                    | 0                              | 0.15  | 0.30  | 0.59  | 1.19  | 2.38  | 80              |
| 1                                  | 7                              | 7     | 0     | 0     | 5     | 0     | 2               |
| 2                                  | 8                              | 4     | 7     | 2     | 0     | 0     | 0               |
| 3                                  | 1                              | 1     | 6     | 2     | 5     | 5     | 1               |
| Total organisms per compartment    | 16                             | 12    | 13    | 4     | 10    | 5     | 3               |
| % Organisms per compartment        | 25.40                          | 19.05 | 20.63 | 6.35  | 15.87 | 7.94  | 4.76            |
| Fisher test (p value) <sup>1</sup> | -                              | >0.05 | >0.05 | =0.05 | >0.05 | >0.05 | <b>&lt;0.05</b> |

<sup>1</sup> Comparisons (expected vs. observed) were performed using the total of organisms (considering the sum of the three replicates) and the distribution of organisms in the control was used as reference. Values in bold represent statistically significant differences.



**Table S6.** Number of organisms (zebrafish) observed after 6 h in each compartment of the non-forced exposure system for the assays with the untreated and treated synthetic waters from the textile industry.

| Repetition                         | Concentration of RR-120 (mg/L) |       |       |       |       |       |                 |
|------------------------------------|--------------------------------|-------|-------|-------|-------|-------|-----------------|
|                                    | Treated water                  |       |       |       |       |       | Untreated water |
|                                    | 0                              | 0.15  | 0.30  | 0.59  | 1.19  | 2.38  | 80              |
| 1                                  | 3                              | 9     | 2     | 3     | 3     | 0     | 1               |
| 2                                  | 3                              | 4     | 10    | 2     | 1     | 1     | 0               |
| 3                                  | 2                              | 3     | 1     | 3     | 6     | 5     | 1               |
| Total organisms per compartment    | 8                              | 16    | 13    | 8     | 10    | 6     | 2               |
| % Organisms per compartment        | 12.70                          | 25.40 | 20.63 | 12.70 | 15.87 | 9.52  | 3.17            |
| Fisher test (p value) <sup>1</sup> | -                              | >0.05 | >0.05 | >0.05 | >0.05 | >0.05 | <b>&gt;0.05</b> |
| Fisher test (p value) <sup>2</sup> | >0.05                          | -     | >0.05 | >0.05 | >0.05 | >0.05 | <b>&lt;0.05</b> |

<sup>1</sup> Comparisons (expected vs. observed) were performed using the total of organisms (considering the sum of the three replicates) and the distribution of organisms in the control was used as reference. Values in bold represent statistically significant differences.

<sup>2</sup> Comparisons (expected vs. observed) were performed using the total of organisms (considering the sum of the three replicates) and the distribution of the compartment with the highest number of organisms (treated water: 0.15 mg/L) was used as reference. Values in bold represent statistically significant differences.

**Table S7.** Number of organisms (zebrafish) observed after 4 h in each compartment of the non-forced exposure system for the assays with the untreated synthetic water from the cassava starch industry.

| Repetition                         | COD content (mg/L) |       |                 |                 |                 |                 |                 |
|------------------------------------|--------------------|-------|-----------------|-----------------|-----------------|-----------------|-----------------|
|                                    | 0                  | 5     | 10              | 25              | 50              | 100             | 200             |
| 1                                  | 14                 | 4     | 1               | 2               | 0               | 0               | 0               |
| 2                                  | 10                 | 10    | 1               | 0               | 0               | 0               | 0               |
| 3                                  | 14                 | 5     | 2               | 0               | 0               | 0               | 0               |
| Total organisms per compartment    | 38                 | 19    | 4               | 2               | 0               | 0               | 0               |
| % Organisms per compartment        | 60.32              | 30.16 | 6.35            | 3.17            | 0.00            | 0.00            | 0.00            |
| Fisher test (p value) <sup>1</sup> | -                  | >0.05 | <b>&lt;0.05</b> | <b>&lt;0.05</b> | <b>&lt;0.05</b> | <b>&lt;0.05</b> | <b>&lt;0.05</b> |

<sup>1</sup> Comparisons (expected vs. observed) were performed using the total of organisms (considering the sum of the three replicates) and the distribution of organisms in the control was used as reference. Values in bold represent statistically significant differences.

**Table S8.** Number of organisms (zebrafish) observed after 6 h in each compartment of the non-forced exposure system for the assays with the untreated synthetic water from the cassava starch industry.

| Repetition                         | COD content (mg/L) |       |                 |                 |                 |                 |                 |
|------------------------------------|--------------------|-------|-----------------|-----------------|-----------------|-----------------|-----------------|
|                                    | 0                  | 5     | 10              | 25              | 50              | 100             | 200             |
| 1                                  | 6                  | 13    | 1               | 1               | 0               | 0               | 0               |
| 2                                  | 14                 | 4     | 2               | 1               | 0               | 0               | 0               |
| 3                                  | 11                 | 7     | 2               | 1               | 0               | 0               | 0               |
| Total organisms per compartment    | 31                 | 24    | 5               | 3               | 0               | 0               | 0               |
| % Organisms per compartment        | 49.21              | 38.10 | 7.94            | 4.76            | 0.00            | 0.00            | 0.00            |
| Fisher test (p value) <sup>1</sup> | -                  | >0.05 | <b>&lt;0.05</b> | <b>&lt;0.05</b> | <b>&lt;0.05</b> | <b>&lt;0.05</b> | <b>&lt;0.05</b> |

<sup>1</sup> Comparisons (expected vs. observed) were performed using the total of organisms (considering the sum of the three replicates) and the distribution of organisms in the control was used as reference. Values in bold represent statistically significant differences.

**Table S9.** Number of organisms (zebrafish) observed after 4 h in each compartment of the non-forced exposure system for the assays with the treated synthetic water from the cassava starch industry.

| Repetition                         | COD content (mg/L) |       |                 |                 |       |                 |       |
|------------------------------------|--------------------|-------|-----------------|-----------------|-------|-----------------|-------|
|                                    | 0                  | 5     | 10              | 25              | 50    | 100             | 200   |
| 1                                  | 0                  | 2     | 2               | 1               | 4     | 9               | 3     |
| 2                                  | 3                  | 5     | 2               | 0               | 3     | 3               | 5     |
| 3                                  | 0                  | 0     | 1               | 2               | 4     | 7               | 7     |
| Total organisms per compartment    | 3                  | 7     | 5               | 3               | 11    | 19              | 15    |
| % Organisms per compartment        | 4.76               | 11.11 | 7.94            | 4.76            | 17.46 | 30.16           | 23.81 |
| Fisher test (p value) <sup>1</sup> | -                  | >0.05 | >0.05           | >0.05           | >0.05 | <b>&lt;0.05</b> | >0.05 |
| Fisher test (p value) <sup>2</sup> | <b>&lt;0.05</b>    | >0.05 | <b>&lt;0.05</b> | <b>&lt;0.05</b> | >0.05 | -               | >0.05 |

<sup>1</sup> Comparisons (expected vs. observed) were performed using the total of organisms (considering the sum of the three replicates) and the distribution of organisms in the control was used as reference. Values in bold represent statistically significant differences.

<sup>2</sup> Comparisons (expected vs. observed) were performed using the total of organisms (considering the sum of the three replicates) and the distribution of the compartment with the highest number of organisms (treated water: 0.15 mg/L) was used as reference. Values in bold represent statistically significant differences.

**Table S10.** Number of organisms (zebrafish) observed after 6 h in each compartment of the non-forced exposure system for the assays with the treated synthetic water from the cassava starch industry.

| Repetition                         | COD content (mg/L) |                 |       |       |       |       |       |
|------------------------------------|--------------------|-----------------|-------|-------|-------|-------|-------|
|                                    | 0                  | 5               | 10    | 25    | 50    | 100   | 200   |
| 1                                  | 0                  | 1               | 6     | 5     | 4     | 5     | 0     |
| 2                                  | 2                  | 0               | 1     | 3     | 5     | 3     | 7     |
| 3                                  | 2                  | 0               | 0     | 3     | 4     | 7     | 5     |
| Total organisms per compartment    | 4                  | 1               | 7     | 11    | 13    | 15    | 12    |
| % Organisms per compartment        | 6.35               | 1.59            | 11.11 | 17.46 | 20.63 | 23.81 | 19.05 |
| Fisher test (p value) <sup>1</sup> | -                  | >0.05           | >0.05 | >0.05 | >0.05 | >0.05 | >0.05 |
| Fisher test (p value) <sup>2</sup> | >0.05              | <b>&lt;0.05</b> | >0.05 | >0.05 | >0.05 | -     | >0.05 |

<sup>1</sup> Comparisons (expected vs. observed) were performed using the total of organisms (considering the sum of the three replicates) and the distribution of organisms in the control was used as reference.

<sup>2</sup> Comparisons (expected vs. observed) were performed using the total of organisms (considering the sum of the three replicates) and the distribution of the compartment with the highest number of organisms (treated water: 0.15 mg/L) was used as reference. Values in bold represent statistically significant differences.
